# Supplementary material for: Diagnostic Ultrasound-Based Investigation of Central vs. Peripheral Arterial Changes Consequent to Low-Dose Caffeine Ingestion
Source: MDPI journal article supplement (doi:10.3390/nu16020228), 2024-01-10
Supplement: s1 [file s1]

**Supplementary Table S1.** Comparison of blood pressure (BP) using RM ANOVA.

| Vessel | BP  | Time   | F     | <i>p</i> | Factor 1 | Factor 2 | Mean Difference ± SE<br>(Factor 1 – Factor 2) | <i>t</i> | <i>p</i> <sub>Tukey</sub> |
|--------|-----|--------|-------|----------|----------|----------|-----------------------------------------------|----------|---------------------------|
| CCA    | SBP | 0 min  | 1.23  | 0.303    | 0 min    | 30 min   | −0.913 ± 1.08                                 | −0.844   | 0.680                     |
|        |     | 30 min |       |          |          | 60 min   | −1.783 ± 1.29                                 | −1.384   | 0.366                     |
|        |     | 60 min |       |          | 30 min   | 60 min   | −0.870 ± 1.03                                 | −0.846   | 0.679                     |
|        | DBP | 0 min  | 0.206 | 0.815    | 0 min    | 30 min   | 0.231 ± 0.915                                 | 0.252    | 0.966                     |
|        |     | 30 min |       |          |          | 60 min   | −0.346 ± 1.001                                | −0.346   | 0.936                     |
|        |     | 60 min |       |          | 30 min   | 60 min   | −0.577 ± 0.785                                | −0.735   | 0.745                     |
| RA     | SBP | 0 min  | 1.63  | 0.210    | 0 min    | 30 min   | 0.476 ± 0.953                                 | 0.500    | 0.872                     |
|        |     | 30 min |       |          |          | 60 min   | −1.381 ± 1.233                                | −1.120   | 0.513                     |
|        |     | 60 min |       |          | 30 min   | 60 min   | −1.857 ± 1.003                                | −1.851   | 0.179                     |
|        | DBP | 0 min  | 1.14  | 0.328    | 0 min    | 30 min   | −0.692 ± 0.815                                | −0.850   | 0.676                     |
|        |     | 30 min |       |          |          | 60 min   | −1.154 ± 0.817                                | −1.413   | 0.350                     |
|        |     | 60 min |       |          | 30 min   | 60 min   | −0.462 ± 0.666                                | −0.693   | 0.770                     |

Abbreviations: CCA, Common carotid artery; DBP, Diastolic blood pressure; F, F statistic; RA, Radial artery; SBP, Systolic blood pressure; SE, Standard error; *t*, *t* statistic.
